# Supplementary material for: 100 years of anthropogenic impact causes changes in freshwater functional biodiversity
Source: eLife. 2023 Nov 7;12:RP86576. doi: 10.7554/eLife.86576 (PMC10629823; doi:10.7554/eLife.86576)
Supplement: Supplementary file 1. — CCA loadings calculated with sparse canonical correlation analysis for biocides (A) and climate variables (B). The categories of biocides are insecticides, fungicides, pesticides and herbicides. The environmental variables are mean minimum temperature, maximum daily precipitation, highest recorded temperature, mean summer temperature, summer precipitation, annual total precipitation, summer atmospheric pressure and lowest recorded temperature. [file elife-86576-supp1.xlsx]

## Sheet: Sheet1
	18S	16V1	16V4	rbcl	COI
A)Biocides
1	insecticide	insecticide	insecticide	insecticide	fungicide
2	fungicide	fungicide	fungicide	fungicide	insecticide
3	pesticide	pesticide	pesticide	pesticide	pesticide
4	herbicide	herbicide	herbicide	herbicide	herbicide
B) Climate variables
1	mean minimum temperature	mean minimum temperature	mean minimum temperature	mean minimum temperature	mean minimum temperature
2	summer mean atmospheric pressure	summer total precipitation	maximum daily precipitation	summer total precipitation	annual total precipitation
3	summer mean temperature	highest recorded temp	summer mean temperature	maximum daily precipitation	highest recorded temp
4	highest recorded temp	summer mean temperature	highest recorded temperature	summer mean temperature	summer mean atmospheric pressure
5	summer total precipitation	lowest recorded temperature	summer total precipitation	annual total precipitation	summer mean temperature
